# Supplementary material
Source: PubMed Central journal article supplement (PMC7067513)
Supplement: NIHMS1540746-supplement-Supplementary_Tables_and_Figures.pdf [file NIHMS1540746-supplement-Supplementary_Tables_and_Figures.pdf]

## Supplementary Tables and Figures

# Comparative Genomics Reveals Shared Mutational Landscape in Canine Hemangiosarcoma and Human Angiosarcoma

**Table S1 - Canine cohort metadata**

| Case ID | Tissue preservation | Location | Nonsynonymous and splice site/region mutations | Sex | Age |
|---------|---------------------|----------|------------------------------------------------|-----|-----|
| HSA_1   | fixed               | liver    | 17                                             | F   | 10  |
| HSA_2   | frozen              | spleen   | 22                                             | M   | 9   |
| HSA_3   | fixed               | heart    | 36                                             | F   | 11  |
| HSA_4   | frozen              | spleen   | 26                                             | F   | 10  |
| HSA_5   | fixed               | liver    | 31                                             | M   | 11  |
| HSA_6   | frozen              | spleen   | 22                                             | M   | 10  |
| HSA_7   | fixed               | liver    | 18                                             | M   | 6   |
| HSA_8   | fixed               | heart    | 31                                             | F   | 5   |
| HSA_9   | frozen              | spleen   | 18                                             | F   | 11  |
| HSA_10  | fixed               | heart    | 10                                             | F   | 12  |
| HSA_11  | frozen              | spleen   | 26                                             | M   | 7   |
| HSA_12  | fixed               | heart    | 22                                             | M   | 10  |
| HSA_13  | fixed               | spleen   | 14                                             | F   | 8   |
| HSA_14  | fixed               | spleen   | 11                                             | F   | 11  |
| HSA_15  | fixed               | heart    | 25                                             | F   | 15  |
| HSA_16  | frozen              | spleen   | 38                                             | M   | 10  |
| HSA_17  | frozen              | heart    | 34                                             | F   | 8   |
| HSA_18  | frozen              | spleen   | 13                                             | M   | 9   |
| HSA_19  | frozen              | spleen   | 17                                             | M   | 3   |
| HSA_20  | frozen              | heart    | 22                                             | M   | 9   |
| HSA_21  | fixed               | heart    | 65                                             | F   | 8   |
| HSA_22  | fixed               | heart    | 35                                             | M   | 12  |
| HSA_23  | frozen              | spleen   | 5                                              | F   | 11  |
| HSA_24  | fixed               | liver    | 37                                             | F   | 10  |
| HSA_25  | fixed               | liver    | 27                                             | M   | 12  |
| HSA_26  | frozen              | spleen   | 3                                              | F   | 14  |
| HSA_27  | frozen              | spleen   | 43                                             | F   | 9   |
| HSA_28  | frozen              | heart    | 46                                             | M   | 9   |
| HSA_29  | frozen              | spleen   | 27                                             | M   | 13  |
| HSA_30  | fixed               | spleen   | 3                                              | M   | NA  |
| HSA_31  | fixed               | spleen   | 44                                             | M   | NA  |
| HSA_32  | fixed               | spleen   | 22                                             | F   | NA  |
| HSA_33  | fixed               | spleen   | 7                                              | M   | NA  |
| HSA_34  | fixed               | spleen   | 13                                             | M   | NA  |

|        |        |         |     |   |    |
|--------|--------|---------|-----|---|----|
| HSA_35 | fixed  | heart   | 48  | F | 11 |
| HSA_36 | fixed  | heart   | 16  | F | 9  |
| HSA_37 | fixed  | heart   | 152 | F | 15 |
| HSA_38 | fixed  | spleen  | 13  | M | NA |
| HSA_39 | fixed  | heart   | 33  | F | NA |
| HSA_40 | fixed  | heart   | 16  | F | NA |
| HSA_41 | frozen | heart   | 30  | M | NA |
| HSA_42 | fixed  | liver   | 24  | M | NA |
| HSA_43 | fixed  | spleen  | 46  | F | NA |
| HSA_44 | frozen | spleen  | 14  | F | 4  |
| HSA_45 | fixed  | liver   | 23  | F | 5  |
| HSA_46 | fixed  | liver   | 42  | F | 13 |
| HSA_47 | fixed  | unknown | 1   | F | 11 |

**Table S2 - Canine library preparation, amplification, and complexity**

| Case ID | Tumor/<br>Normal | Sequencing<br>depth | Input<br>DNA | Overamplified | Tissue<br>preservatio<br>n | Nonsynonymous and<br>splice site/region<br>mutations | Library size |
|---------|------------------|---------------------|--------------|---------------|----------------------------|------------------------------------------------------|--------------|
| HSA_1   | Normal           | 49                  | 1000         | Yes           | EDTA                       |                                                      | 134561459    |
| HSA_1   | Tumor            | 53                  | 1000         | Yes           | fixed                      | 17                                                   | 38155922     |
| HSA_2   | Normal           | 71                  | 1000         | Yes           | EDTA                       |                                                      | 226048914    |
| HSA_2   | Tumor            | 91                  | 1000         | Yes           | frozen                     | 22                                                   | 136254048    |
| HSA_3   | Normal           | 73                  | 1000         | Yes           | EDTA                       |                                                      | 134978503    |
| HSA_3   | Tumor            | 26                  | 1000         | Yes           | fixed                      | 36                                                   | 20412528     |
| HSA_4   | Normal           | 61                  | 1000         | Yes           | EDTA                       |                                                      | 231846809    |
| HSA_4   | Tumor            | 99                  | 1000         | Yes           | frozen                     | 26                                                   | 103917348    |
| HSA_5   | Normal           | 51                  | 1000         | Yes           | EDTA                       |                                                      | 370312244    |
| HSA_5   | Tumor            | 41                  | 1000         | Yes           | fixed                      | 31                                                   | 32017163     |
| HSA_6   | Normal           | 63                  | 1000         | Yes           | EDTA                       |                                                      | 225490375    |
| HSA_6   | Tumor            | 84                  | 1000         | Yes           | frozen                     | 22                                                   | 130755435    |
| HSA_7   | Normal           | 53                  | 1000         | Yes           | EDTA                       |                                                      | 269484482    |
| HSA_7   | Tumor            | 89                  | 1000         | Yes           | fixed                      | 18                                                   | 73256644     |
| HSA_8   | Normal           | 80                  | 1000         | Yes           | EDTA                       |                                                      | 268801501    |
| HSA_8   | Tumor            | 75                  | 1000         | Yes           | fixed                      | 31                                                   | 81740488     |
| HSA_9   | Normal           | 62                  | 1000         | Yes           | EDTA                       |                                                      | 281443846    |
| HSA_9   | Tumor            | 101                 | 1000         | Yes           | frozen                     | 18                                                   | 210031996    |
| HSA_10  | Normal           | 83                  | 1000         | No            | EDTA                       |                                                      | 355514908    |
| HSA_10  | Tumor            | 78                  | 1000         | No            | fixed                      | 10                                                   | 69807014     |
| HSA_11  | Normal           | 68                  | NA           | No            | EDTA                       |                                                      | 277032267    |
| HSA_11  | Tumor            | 126                 | 1000         | No            | frozen                     | 26                                                   | 324015250    |

|        |        |     |      |     |        |    |           |
|--------|--------|-----|------|-----|--------|----|-----------|
| HSA_12 | Normal | 62  | 1000 | Yes | EDTA   |    | 221713689 |
| HSA_12 | Tumor  | 55  | 1000 | Yes | fixed  | 22 | 49450048  |
| HSA_13 | Normal | 43  | 1000 | Yes | EDTA   |    | 203071580 |
| HSA_13 | Tumor  | 91  | 1000 | Yes | fixed  | 14 | 144056227 |
| HSA_14 | Normal | 58  | 1000 | Yes | EDTA   |    | 177387584 |
| HSA_14 | Tumor  | 61  | 1000 | Yes | fixed  | 11 | 65437960  |
| HSA_15 | Normal | 75  | 1000 | Yes | EDTA   |    | 127216800 |
| HSA_15 | Tumor  | 56  | 1000 | Yes | fixed  | 25 | 40991888  |
| HSA_16 | Normal | 73  | 1000 | Yes | EDTA   |    | 141452611 |
| HSA_16 | Tumor  | 56  | 1000 | Yes | frozen | 38 | 41118918  |
| HSA_17 | Normal | 62  | 1000 | No  | EDTA   |    | 223257784 |
| HSA_17 | Tumor  | 114 | NA   | No  | frozen | 34 | 147787071 |
| HSA_18 | Normal | 53  | 1000 | Yes | EDTA   |    | 171084585 |
| HSA_18 | Tumor  | 78  | 1000 | Yes | frozen | 13 | 97513922  |
| HSA_19 | Normal | 69  | 1000 | Yes | EDTA   |    | 129594138 |
| HSA_19 | Tumor  | 75  | 1000 | Yes | frozen | 17 | 91271441  |
| HSA_20 | Normal | 67  | 1000 | Yes | EDTA   |    | 110209804 |
| HSA_20 | Tumor  | 91  | 1000 | Yes | frozen | 22 | 161197314 |
| HSA_21 | Normal | 64  | 1000 | No  | EDTA   |    | 293332856 |
| HSA_21 | Tumor  | 144 | 309* | No  | fixed  | 65 | 161501907 |
| HSA_22 | Normal | 62  | 1000 | Yes | EDTA   |    | 123858089 |
| HSA_22 | Tumor  | 57  | 1000 | Yes | fixed  | 35 | 42916453  |
| HSA_23 | Normal | 54  | 1000 | Yes | EDTA   |    | 214634405 |
| HSA_23 | Tumor  | 84  | 1000 | Yes | frozen | 5  | 163422686 |
| HSA_24 | Normal | 51  | 1000 | Yes | EDTA   |    | 130312170 |
| HSA_24 | Tumor  | 56  | 1000 | Yes | fixed  | 37 | 40995053  |
| HSA_25 | Normal | 62  | 1000 | No  | EDTA   |    | 232499575 |
| HSA_25 | Tumor  | 46  | 1000 | Yes | fixed  | 27 | 34254483  |
| HSA_26 | Normal | 74  | 1000 | No  | EDTA   |    | 159151355 |
| HSA_26 | Tumor  | 93  | 381* | No  | frozen | 3  | 128242059 |
| HSA_27 | Normal | 74  | 1000 | Yes | EDTA   |    | 100619527 |
| HSA_27 | Tumor  | 96  | 1000 | Yes | frozen | 43 | 135472727 |
| HSA_28 | Normal | 90  | 1000 | No  | EDTA   |    | 229798708 |
| HSA_28 | Tumor  | 109 | 469* | No  | frozen | 46 | 196472240 |
| HSA_29 | Normal | 52  | 1000 | No  | EDTA   |    | 280852929 |
| HSA_29 | Tumor  | 125 | 425* | No  | frozen | 27 | 316081507 |
| HSA_30 | Normal | 69  | 1000 | Yes | EDTA   |    | 131692351 |
| HSA_30 | Tumor  | 85  | 1000 | Yes | fixed  | 3  | 100942519 |
| HSA_31 | Normal | 50  | 1000 | Yes | EDTA   |    | 118651337 |
| HSA_31 | Tumor  | 75  | 1000 | Yes | fixed  | 44 | 48558498  |
| HSA_32 | Normal | 59  | 1000 | Yes | EDTA   |    | 137223693 |

|        |        |     |      |     |        |     |           |
|--------|--------|-----|------|-----|--------|-----|-----------|
| HSA_32 | Tumor  | 40  | 1000 | Yes | fixed  | 22  | 25433630  |
| HSA_33 | Normal | 65  | 1000 | Yes | EDTA   |     | 116541031 |
| HSA_33 | Tumor  | 54  | 1000 | Yes | fixed  | 7   | 63455690  |
| HSA_34 | Normal | 60  | 1000 | Yes | EDTA   |     | 89817007  |
| HSA_34 | Tumor  | 74  | 1000 | Yes | fixed  | 13  | 44486076  |
| HSA_35 | Normal | 51  | 1000 | No  | EDTA   |     | 210786142 |
| HSA_35 | Tumor  | 114 | 295* | No  | fixed  | 48  | 163041517 |
| HSA_36 | Normal | 27  | 1000 | Yes | EDTA   |     | 58556571  |
| HSA_36 | Tumor  | 45  | 1000 | Yes | fixed  | 16  | 56260934  |
| HSA_37 | Normal | 54  | 1000 | No  | EDTA   |     | 98731048  |
| HSA_37 | Tumor  | 128 | 871* | No  | fixed  | 152 | 127593218 |
| HSA_38 | Normal | 67  | 1000 | Yes | EDTA   |     | 87139774  |
| HSA_38 | Tumor  | 45  | 1000 | Yes | fixed  | 13  | 31958634  |
| HSA_39 | Normal | 95  | NA   | No  | EDTA   |     | 171064700 |
| HSA_39 | Tumor  | 93  | 355* | No  | fixed  | 33  | 88831176  |
| HSA_40 | Normal | 54  | 1000 | Yes | EDTA   |     | 65023743  |
| HSA_40 | Tumor  | 18  | 1000 | Yes | fixed  | 16  | 16470714  |
| HSA_41 | Normal | 59  | 1000 | No  | EDTA   |     | 173375722 |
| HSA_41 | Tumor  | 97  | 480* | No  | frozen | 30  | 119131774 |
| HSA_42 | Normal | 98  | 1000 | No  | EDTA   |     | 190927431 |
| HSA_42 | Tumor  | 108 | 941* | No  | fixed  | 24  | 120828418 |
| HSA_43 | Normal | 51  | 1000 | Yes | EDTA   |     | 90620114  |
| HSA_43 | Tumor  | 158 | 373* | No  | fixed  | 46  | 206945827 |
| HSA_44 | Normal | 60  | 1000 | Yes | EDTA   |     | 50917493  |
| HSA_44 | Tumor  | 42  | 1000 | Yes | frozen | 14  | 32736117  |
| HSA_45 | Normal | 88  | 1000 | No  | EDTA   |     | 288287484 |
| HSA_45 | Tumor  | 108 | 292* | No  | fixed  | 23  | 108587264 |
| HSA_46 | Normal | 33  | 1000 | Yes | EDTA   |     | 27281614  |
| HSA_46 | Tumor  | 40  | 1000 | Yes | fixed  | 42  | 27533702  |
| HSA_47 | Normal | 57  | 1000 | Yes | EDTA   |     | 48624834  |
| HSA_47 | Tumor  | 16  | 1000 | Yes | fixed  | 1   | 14145086  |

Sequencing depth, DNA input amount, whether library was overamplified, tissue preservation, number of nonsynonymous, splice site, and splice region mutations, and estimated library size (unique molecules) per library.

\* estimated input amount.

**Table S3 - COSMIC Cancer Gene Census genes**

| <b>Gene</b>   | <b># samples</b> | <b>Gene</b> | <b># samples</b> |
|---------------|------------------|-------------|------------------|
| <b>TP53</b>   | 28               | JAK1        | 1                |
| <b>PIK3CA</b> | 14               | KAT6B       | 1                |
| <b>PIK3R1</b> | 4                | KDM5A       | 1                |
| CHD4          | 3                | KDR         | 1                |
| CACNA1D       | 2                | KEAP1       | 1                |
| LRP1B         | 2                | KMT2A       | 1                |
| MECOM         | 2                | KMT2D       | 1                |
| NRAS          | 2                | LEF1        | 1                |
| PAX3          | 2                | MAP3K13     | 1                |
| PTEN          | 2                | MITF        | 1                |
| AFF4          | 1                | MTOR        | 1                |
| AR            | 1                | MYH11       | 1                |
| ARID1A        | 1                | MYH9        | 1                |
| ATR           | 1                | NCOR1       | 1                |
| ATRX          | 1                | NFE2L2      | 1                |
| BCL9          | 1                | NRG1        | 1                |
| BRAF          | 1                | NTRK3       | 1                |
| BRCA2         | 1                | NUP214      | 1                |
| CASP8         | 1                | PIK3CB      | 1                |
| CBFA2T3       | 1                | PLCG1       | 1                |
| CDK12         | 1                | PTPRK       | 1                |
| CLTC          | 1                | RBM10       | 1                |
| CLTCL1        | 1                | RNF213      | 1                |
| DICER1        | 1                | RNF43       | 1                |
| ERBB4         | 1                | SFRP4       | 1                |
| ERC1          | 1                | SLC34A2     | 1                |
| FGFR3         | 1                | TERT        | 1                |
| FLT3          | 1                | TMPRSS2     | 1                |
| HOOK3         | 1                | ZFHX3       | 1                |
| IL6ST         | 1                |             |                  |

Genes mutated at least once in canine exome data, annotated as having likely causal somatic mutations in the COSMIC Cancer Gene Census. Significantly mutated genes in hemangiosarcoma samples bolded.

**Table S4 - Summary of canine RNA-seq data**

| RNA-seq ID    | Exome ID | Breed                          | Tissue | GEO ID     | BioSample ID | Previously published |
|---------------|----------|--------------------------------|--------|------------|--------------|----------------------|
| DHSA-0901     |          | Golden Retriever               | Spleen |            | SAMN12659339 | No                   |
| DHSA-1001     |          | Golden Retriever               | Spleen |            | SAMN12659340 | No                   |
| DHSA-1002_LIV | HSA_22   | Golden Retriever               | Liver  |            | SAMN12659341 | No                   |
| DHSA-1101     | HSA_17   | Golden Retriever               | Heart  |            | SAMN12659342 | No                   |
| DHSA-1102     | HSA_18   | Golden Retriever               | Spleen |            | SAMN12659343 | No                   |
| DHSA-1204     |          | Golden Retriever               | Spleen |            | SAMN12659348 | No                   |
| DHSA-1301     |          | Portugese Water Dog            | Spleen |            | SAMN12659344 | No                   |
| DHSA-1302     | HSA_13   | Golden Retriever               | Spleen |            | SAMN12659345 | No                   |
| DHSA-1304     |          | Mix (Labrador Retriever)       | Liver  |            | SAMN12659346 | No                   |
| DHSA-1306     | HSA_35   | Golden Retriever               | Heart  |            | SAMN12659347 | No                   |
| DHSA-1407     |          | Golden Retriever               | Heart  |            | SAMN12659349 | No                   |
| DHSA-1408     |          | Portugese Water Dog            | Spleen |            | SAMN12659350 | No                   |
| DHSA-1409     |          | German Shepherd Dog            | Spleen |            | SAMN12659351 | No                   |
| DHSA-1415     | HSA_36   | Golden Retriever               | Heart  |            | SAMN12659352 | No                   |
| DHSA-1416     |          | Mix                            | Spleen |            | SAMN12659353 | No                   |
| DHSA-1423     |          | Mix (Labrador Retriever)       | Spleen |            | SAMN12659354 | No                   |
| DHSA-1426     |          | Golden Retriever               | Spleen |            | SAMN12659355 | No                   |
| DHSA-1434     |          | Parsons Russell Terrier        | Spleen |            | SAMN12659356 | No                   |
| DHSA-1503     |          | Golden Retriever               | Spleen |            | SAMN12659357 | No                   |
| DHSA-1504     |          | Golden Retriever               | Spleen |            | SAMN12659358 | No                   |
| DHSA-1512     |          | German Shepherd Dog            | Spleen |            | SAMN12659359 | No                   |
| DHSA-1513     |          | German Shepherd Dog            | Spleen |            | SAMN12659360 | No                   |
| DHSA-1519     |          | American Staffordshire Terrier | Spleen |            | SAMN12659361 | No                   |
| CHAD-B7       |          | Mix (Border collie)            | Heart  | GSM2498352 | SAMN06368910 | Yes                  |
| CHAD-G3       |          | Golden Retriever               | Spleen | GSM2498353 | SAMN06368909 | Yes                  |
| CHAD-G4       | HSA_6    | Golden Retriever               | Spleen | GSM2498354 | SAMN06368908 | Yes                  |
| CHAD-G6       |          | Golden Retriever               | Spleen | GSM2498355 | SAMN06368907 | Yes                  |
| CHAD-G8       |          | Golden Retriever               | Spleen | GSM2498356 | SAMN06368906 | Yes                  |
| CHAD-P9       |          | Portugese Water Dog            | Liver  | GSM2498357 | SAMN06368905 | Yes                  |
| DHSA-0501     |          | Bernese Mountain Dog           | Heart  | GSM2498358 | SAMN06368904 | Yes                  |
| DHSA-0502     | HSA_4    | Golden Retriever               | Spleen | GSM2498359 | SAMN06368903 | Yes                  |
| DHSA-0601     |          | Golden Retriever               | Spleen | GSM2498360 | SAMN06368845 | Yes                  |
| DHSA-0602     | HSA_7    | Golden Retriever               | Spleen | GSM2498361 | SAMN06368901 | Yes                  |

|           |        |                     |                |            |              |     |
|-----------|--------|---------------------|----------------|------------|--------------|-----|
| DHSA-0603 |        | Portugese Water Dog | Heart          | GSM2498362 | SAMN06368900 | Yes |
| DHSA-0604 |        | Keeshond            | Spleen         | GSM2498363 | SAMN06368899 | Yes |
| DHSA-0605 |        | Golden Retriever    | Spleen         | GSM2498364 | SAMN06368898 | Yes |
| DHSA-0606 |        | German Shepherd Dog | Spleen         | GSM2498365 | SAMN06368897 | Yes |
| DHSA-0701 |        | Bichon Frise        | Cutaneous      | GSM2498366 | SAMN06368896 | Yes |
| DHSA-0702 |        | Bullmastiff         | Spleen         | GSM2498367 | SAMN06368895 | Yes |
| DHSA-0803 |        | Golden Retriever    | Heart          | GSM2498368 | SAMN06368894 | Yes |
| DHSA-0804 | HSA_11 | Golden Retriever    | Omentum        | GSM2498369 | SAMN06368893 | Yes |
| DHSA-0805 |        | Golden Retriever    | Spleen         | GSM2498370 | SAMN06368892 | Yes |
| DHSA-0903 |        | Golden Retriever    | Spleen         | GSM2498371 | SAMN06368891 | Yes |
| DHSA-0904 | HSA_20 | Golden Retriever    | Heart          | GSM2498372 | SAMN06368890 | Yes |
| DHSA-0905 | HSA_21 | Golden Retriever    | Heart          | GSM2498373 | SAMN06368889 | Yes |
| DHSA-0906 | HSA_19 | Golden Retriever    | Spleen         | GSM2498374 | SAMN06368888 | Yes |
| DHSA-0907 |        | Portugese Water Dog | Liver          | GSM2498375 | SAMN06368887 | Yes |
| DHSA-0908 |        | Boxer               | Abdominal mass | GSM2498402 | SAMN06368928 | Yes |
| DHSA-0909 | HSA_24 | Golden Retriever    | Spleen         | GSM2498376 | SAMN06368886 | Yes |
| DHSA-0910 |        | Keeshond            | Liver          | GSM2498377 | SAMN06368880 | Yes |
| DHSA-1002 | HSA_22 | Golden Retriever    | Spleen         | GSM2498378 | SAMN06368879 | Yes |
| DHSA-1006 |        | German Shepherd Dog | Spleen         | GSM2498379 | SAMN06368878 | Yes |
| DHSA-1007 |        | Gordon Setter       | Spleen         | GSM2498380 | SAMN06368885 | Yes |
| DHSA-1008 | HSA_1  | Golden Retriever    | Liver          | GSM2498381 | SAMN06368884 | Yes |
| DHSA-1009 |        | German Shepherd Dog | Spleen         | GSM2498382 | SAMN06368883 | Yes |
| DHSA-1010 | HSA_29 | Golden Retriever    | Spleen         | GSM2498383 | SAMN06368882 | Yes |
| DHSA-1011 |        | Boxer               | Spleen         | GSM2498384 | SAMN06368881 | Yes |
| DHSA-1013 |        | Labrador Retriever  | Spleen         | GSM2498385 | SAMN06368877 | Yes |
| DHSA-1014 |        | Golden Retriever    | Spleen         | GSM2498386 | SAMN06368876 | Yes |
| DHSA-1015 |        | Mix (Wolf)          | Liver          | GSM2498387 | SAMN06368850 | Yes |
| DHSA-1016 |        | Golden Retriever    | Heart          | GSM2498388 | SAMN06368849 | Yes |
| DHSA-1017 |        | Briard              | Spleen         | GSM2498389 | SAMN06368848 | Yes |
| DHSA-1103 | HSA_26 | Golden Retriever    | Spleen         | GSM2498390 | SAMN06368847 | Yes |
| DHSA-1106 | HSA_27 | Golden Retriever    | Spleen         | GSM2498391 | SAMN06368846 | Yes |
| DHSA-1107 |        | Golden Retriever    | Heart          | GSM2498392 | SAMN06368932 | Yes |
| DHSA-1108 |        | Labrador Retriever  | Heart          | GSM2498393 | SAMN06368931 | Yes |
| DHSA-1109 | HSA_28 | Golden Retriever    | Heart          | GSM2498394 | SAMN06368856 | Yes |

|           |  |                                    |         |            |              |     |
|-----------|--|------------------------------------|---------|------------|--------------|-----|
| DHSA-1110 |  | Golden Retriever                   | Liver   | GSM2498395 | SAMN06368855 | Yes |
| DHSA-1111 |  | Golden Retriever                   | Spleen  | GSM2498396 | SAMN06368854 | Yes |
| DHSA-1112 |  | Portugese Water Dog                | Spleen  | GSM2498397 | SAMN06368853 | Yes |
| DHSA-1113 |  | Saluki                             | Heart   | GSM2498398 | SAMN06368852 | Yes |
| DHSA-1114 |  | Golden Retriever                   | Spleen  | GSM2498399 | SAMN06368851 | Yes |
| DHSA-1202 |  | Golden Retriever                   | Spleen  | GSM2498400 | SAMN06368930 | Yes |
| DHSA-1203 |  | Mix (Labrador Retriever,<br>Husky) | Bladder | GSM2498401 | SAMN06368929 | Yes |

Summary of canine RNA-seq data used in this analysis. The RNA-seq ID is the ID under which the data was published, with GEO and BioSample IDs linking to each sample file. If the same dog was included in the exome dataset, the exome ID is given. In cases where the same dog was included, but different tumor locations were sequenced in the WES and RNA-seq, the Exome ID is noted in red. Fifty-one of the 74 RNA-seq samples had been previously published (1,2).



**Table S5 - RNA-seq validation**

| Case ID | Variant                     | Location    | Mutation    | Fixed/<br>Frozen | VAF  | Histo | ESTIMATE | Validated | A:T:C:G:N:<>+:-.*         |
|---------|-----------------------------|-------------|-------------|------------------|------|-------|----------|-----------|---------------------------|
| HSA_36  | chr6:10232318:ARPC1A:A:C    | same        | Missense    | fixed            | 0.16 | 0.00  | 0.69     | Yes       | 283 0:0:36:0:0:1:0:0:0    |
| HSA_17  | chr6:10238294:ARPC1A:G:A    | same        | Nonsense    | frozen           | 0.17 | 0.20  | 0.53     | Yes       | 249 8:0:0:0:0:3:0:0:0     |
| HSA_21  | chr15:8982528:ORC1:A:C      | same        | Missense    | fixed            | 0.05 | 0.70  | 0.64     | No        | 9 0:0:0:0:0:0:0:0:0       |
| HSA_35  | chr15:8982528:ORC1:A:C      | same        | Missense    | fixed            | 0.08 | 0.50  | 0.71     | No        | 16 0:0:1:0:0:0:0:0:0      |
| HSA_18  | chr34:12651933:PIK3CA:G:A   | same        | Missense    | frozen           | 0.06 | NA    | 0.53     | No        | 9 0:0:0:0:0:0:0:0:0       |
| HSA_4   | chr34:12675674:PIK3CA:A:T   | same        | Missense    | frozen           | 0.25 | 0.05  | 0.72     | No        | 67 0:0:0:11:0:0:0:0:0     |
| HSA_27  | chr34:12675674:PIK3CA:A:G   | same        | Missense    | frozen           | 0.23 | 0.60  | 0.42     | No        | 38 0:0:0:1:0:1:0:0:0      |
| HSA_28  | chr34:12675674:PIK3CA:A:T   | same        | Missense    | frozen           | 0.19 | 0.80  | 0.55     | Yes       | 24 0:3:0:0:0:0:0:0:0      |
| HSA_29  | chr34:12675674:PIK3CA:A:G   | same        | Missense    | frozen           | 0.11 | 0.23  | 0.71     | Yes       | 29 0:0:0:11:0:0:0:0:0     |
| HSA_36  | chr34:12651893:PIK3CA:G:A   | same        | Missense    | fixed            | 0.15 | 0.00  | 0.69     | Yes       | 35 10:0:0:0:0:0:0:0:0     |
| HSA_21  | chr2:53522035:PIK3R1:A:G    | same        | Missense    | fixed            | 0.17 | 0.70  | 0.64     | Yes       | 41 0:0:0:5:0:0:0:0:0      |
| HSA_18  | chr3:21093342:RASA1:G:A     | same        | Nonsense    | frozen           | 0.11 | NA    | 0.53     | No        | 20 0:0:0:0:0:0:0:0:0      |
| HSA_28  | chr3:21108103:RASA1:A:T     | same        | Nonsense    | frozen           | 0.13 | 0.80  | 0.55     | Yes       | 29 0:3:0:0:0:0:0:0:0      |
| HSA_4   | chr5:32563923:TP53:C:T      | same        | Missense    | frozen           | 0.32 | 0.05  | 0.72     | No        | 49 0:0:0:0:0:0:0:0:0      |
| HSA_19  | chr5:32563056:TP53:G:A      | same        | Missense    | frozen           | 0.18 | 0.60  | 0.61     | Yes       | 66 14:0:0:0:0:0:0:0:0     |
| HSA_20  | chr5:32563698:TP53:A:T      | same        | Missense    | frozen           | 0.26 | 0.35  | 0.37     | No        | 40 0:0:0:0:0:0:0:0:0      |
| HSA_21  | chr5:32563404:TP53:C:T      | same        | Missense    | fixed            | 0.27 | 0.70  | 0.64     | Yes       | 125 0:40:0:1:0:0:0:0:0    |
| HSA_17  | chr5:32563712:TP53:C:T      | same        | Missense    | frozen           | 0.47 | 0.20  | 0.53     | Yes       | 92 0:14:0:0:0:0:0:0:0     |
| HSA_21  | chr5:32564616:TP53:A:G      | same        | Missense    | fixed            | 0.19 | 0.70  | 0.64     | Yes       | 95 0:0:0:35:0:0:0:0:0     |
| HSA_29  | chr5:32563959:TP53:CCATAG:C | same        | Frame shift | frozen           | 0.09 | 0.23  | 0.71     | No        | 25 20:10:10:10:0:1:0:10:0 |
| HSA_1   | chr5:32561417:TP53:CG:C     | same        | Frame shift | fixed            | 0.17 | 0.10  | 0.61     | No        | 82 0:0:0:15:0:2:0:14:0    |
| HSA_1   | chr5:32563056:TP53:G:A      | same        | Missense    | fixed            | 0.07 | 0.10  | 0.61     | Yes       | 52 14:0:0:0:0:2:0:0:0     |
| HSA_13  | chr5:32563400:TP53:C:T      | same        | Missense    | fixed            | 0.42 | 0.80  | 0.64     | Yes       | 198 0:148:0:0:0:0:0:0:0   |
| HSA_35  | chr5:32563410:TP53:A:C      | same        | Missense    | fixed            | 0.19 | 0.50  | 0.71     | Yes       | 267 0:0:106:0:0:4:0:0:0   |
| HSA_35  | chr5:32563904:TP53:T:C      | same        | Missense    | fixed            | 0.32 | 0.50  | 0.71     | Yes       | 256 0:0:83:0:0:4:0:0:0    |
| HSA_11  | chr34:12675666:PIK3CA:T:G   | different   | Missense    | frozen           | 0.11 | 0.80  | 0.74     | Yes       | 27 0:0:0:13:0:0:0:0:0     |
| HSA_22  | chr5:32563049:TP53:C:A      | different-1 | Missense    | fixed            | 0.1  | 0.05  | 0.53     | No        | 194 2:0:0:0:0:0:0:0:0     |
| HSA_22  | chr5:32563400:TP53:C:T      | different-1 | Missense    | fixed            | 0.32 | 0.05  | 0.53     | No        | 146 0:0:0:0:0:0:0:0:0     |
| HSA_22  | chr5:32563049:TP53:C:A      | different-2 | Missense    | fixed            | 0.1  | 0.25  | 0.76     | No        | 19 0:0:0:0:0:0:0:0:0      |
| HSA_22  | chr5:32563400:TP53:C:T      | different-2 | Missense    | fixed            | 0.32 | 0.25  | 0.76     | No        | 24 0:1:0:0:0:0:0:0:0      |
| HSA_24  | chr5:32563401:TP53:C:T      | different   | Missense    | fixed            | 0.27 | 0.65  | 0.63     | Yes       | 129 0:33:0:0:0:0:0:0:0    |
| HSA_24  | chr5:32563916:TP53:C:T      | different   | Missense    | fixed            | 0.21 | 0.65  | 0.63     | Yes       | 105 0:27:0:1:0:0:0:0:0    |
| HSA_11  | chr5:32564027:TP53:G:A      | different   | Missense    | frozen           | 0.42 | 0.80  | 0.74     | Yes       | 147 116:0:0:0:0:2:0:0:0   |

Validation of mutations found in exome cohort in the same individuals in RNA-seq data. White background - RNA-seq from same tumor location, grey background - RNA-seq from different tumor location. Grey text - frame-shift deletion excluded from validation. Histo - tumor purity based on histologic examination. ESTIMATE - tumor purity estimate based on RNA-seq data from the program ESTIMATE.

**Table S6 - RNA-sequencing survey**

|               | Golden | PWD | GSD | Mix | Boxer | Lab | Keeshond | Other | Total |
|---------------|--------|-----|-----|-----|-------|-----|----------|-------|-------|
| <i>n</i>      | 22     | 6   | 6   | 6   | 2     | 2   | 2        | 8     | 54    |
| <i>TP53</i>   | 6      | 3   | 1   | 3   | 0     | 0   | 1        | 0     | 14    |
| <i>PIK3CA</i> | 2      | 2   | 2   | 2   | 1     | 0   | 2        | 0     | 11    |
| <i>PIK3R1</i> | 1      | 1   | 0   | 0   | 0     | 1   | 0        | 1     | 4     |

Survey of specific mutations identified in the exome sequencing in SMGs in RNA-seq data from canine hemangiosarcoma tumors in 22 golden retrievers and 32 dogs from other breeds.

**Table S7 - Enrichment of protein domains in hemangiosarcoma and angiosarcoma**

(See Excel spreadsheet)

**Table S8 - Canine somatic copy number aberrations by oaCGH**

| Gene            | % with gain | % with loss |
|-----------------|-------------|-------------|
| <i>TP53</i>     | 6           | 7           |
| <i>PIK3CA</i>   | 10          | 4           |
| <i>PIK3R1</i>   | 2           | 3           |
| <i>ORC1</i>     | 7           | 2           |
| <i>RASA1</i>    | 4           | 2           |
| <i>ARPC1A</i>   | 2           | 0           |
| <i>ATP5H</i>    | 0           | 0           |
| <i>PTEN</i>     | 4           | 4           |
| <i>VEGFA</i>    | 19          | 3           |
| <i>MYC</i>      | 9           | 0           |
| <i>CDKN2A/B</i> | 0           | 22          |
| <i>KDR</i>      | 22          | 0           |
| <i>KIT</i>      | 17          | 0           |

Somatic copy number aberrations in SMGs, as well as in selected genes reported to be recurrently altered in canine and human literature, in a cohort of 66 hemangiosarcomas analyzed by oaCGH. (Thomas, *et al.*, manuscript in preparation)(3).

**Table S9 - comparison of top SCNAs in human Angiosarcoma Project data with canine oaCGH data**

| Gene                 | Human      |           | Canine      |             |
|----------------------|------------|-----------|-------------|-------------|
|                      | CNA        | Freq      | Gain        | Loss        |
| <i>PHF1</i>          | AMP        | 43        | 2.9         | 1.5         |
| <i>HOXA3</i>         | AMP        | 33        | 2.9         | 1.5         |
| <i>HOXA9</i>         | AMP        | 30        | 8.7         | 5.8         |
| <i>CD70</i>          | DEL        | 27        | 11.6        | 1.5         |
| <i>DAXX</i>          | AMP        | 27        | 4.4         | 1.5         |
| <i>HOXA11</i>        | AMP        | 27        | 7.3         | 5.8         |
| <b><i>KDR</i></b>    | <b>AMP</b> | <b>27</b> | <b>21.7</b> | <b>0</b>    |
| <i>PPM1D</i>         | AMP        | 27        | 2.9         | 1.5         |
| <i>ZNF331</i>        | DEL        | 27        | 1.5         | 0           |
| <i>CD36</i>          | AMP        | 23        | 4.4         | 1.5         |
| <i>DDX5</i>          | AMP        | 23        | 8.7         | 0           |
| <i>HOXA13</i>        | AMP        | 20        | 7.3         | 5.8         |
| <b><i>AXIN1</i></b>  | <b>DEL</b> | <b>20</b> | <b>2.9</b>  | <b>21.7</b> |
| <i>H3F3B</i>         | AMP        | 17        | 4.4         | 4.4         |
| <i>JAK3</i>          | DEL        | 17        | 8.7         | 5.8         |
| <i>PDGFRB</i>        | AMP        | 17        | 2.9         | 2.9         |
| <i>PIK3C2B</i>       | AMP        | 17        | 4.4         | 8.7         |
| <b><i>PTK6</i></b>   | <b>DEL</b> | <b>17</b> | <b>8.7</b>  | <b>17.4</b> |
| <i>TYRO3</i>         | AMP        | 17        | 0           | 8.7         |
| <b><i>ARFRP1</i></b> | <b>DEL</b> | <b>17</b> | <b>13</b>   | <b>17.4</b> |
| <i>NDRG1</i>         | AMP        | 17        | 8.7         | 2.9         |
| <i>WWTR1</i>         | AMP        | 17        | 1.5         | 2.9         |
| <b><i>RTEL1</i></b>  | <b>DEL</b> | <b>17</b> | <b>13</b>   | <b>17.4</b> |

Percentage copy number gain or loss in oaCGH data from 69 golden retriever hemangiosarcomas compared with the most frequent SCNAs (affecting >15% of patients) in known cancer genes in 30 primary tumor samples from The Angiosarcoma Project. SCNAs affecting >15% of patients in the same direction in both species bolded. (Thomas, *et al.*, manuscript in preparation)(3).

**Figure S1 - Canine exome sequencing workflow**

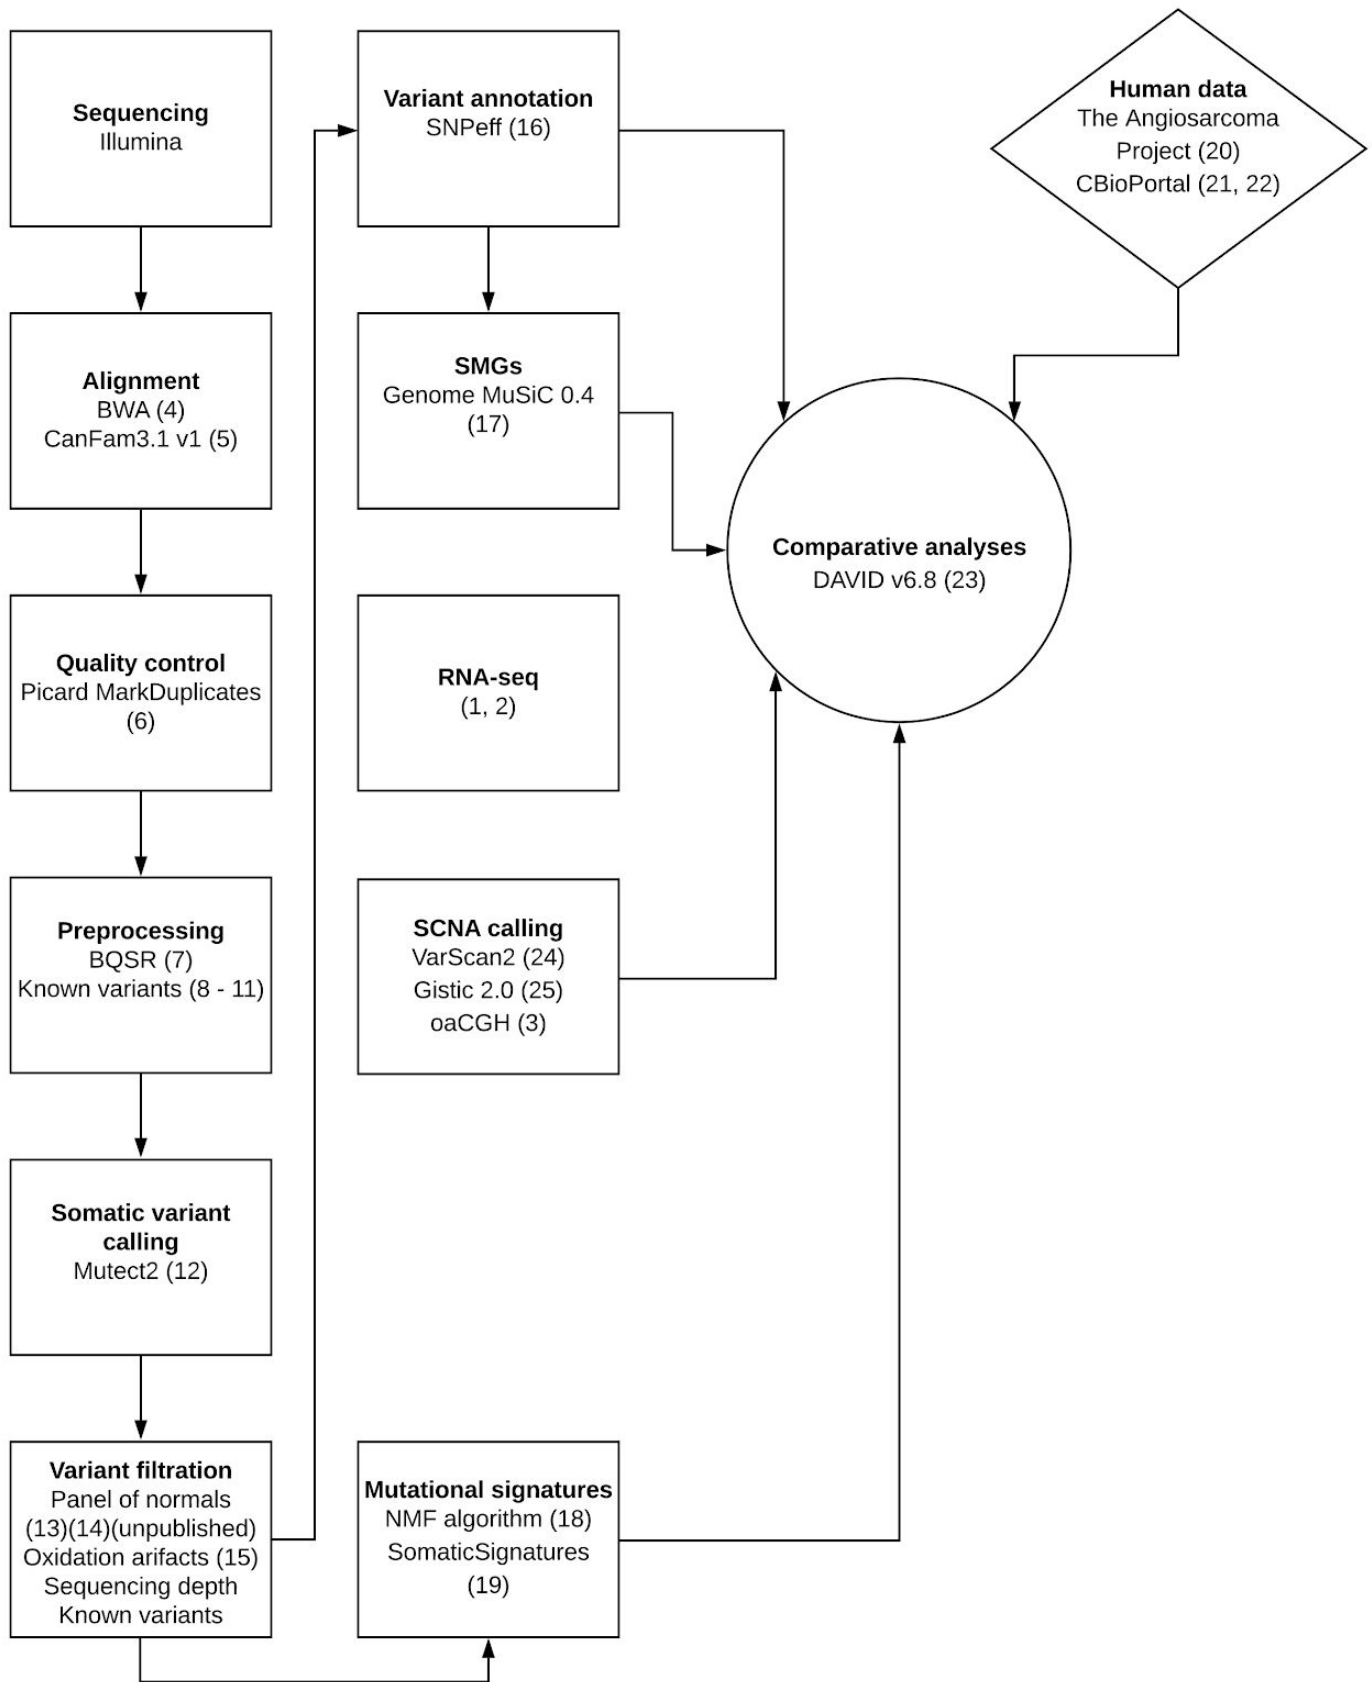

Figure S2 - Canine SMGs called in normal vs. overamplified libraries

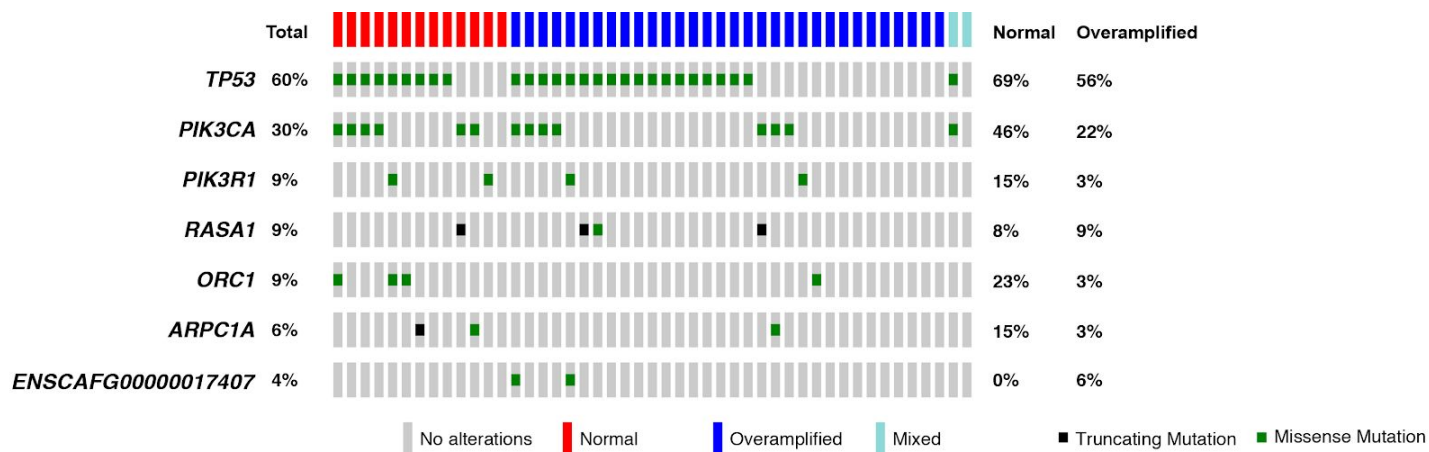

Figure S3 - Mutational landscape of entire canine cohort

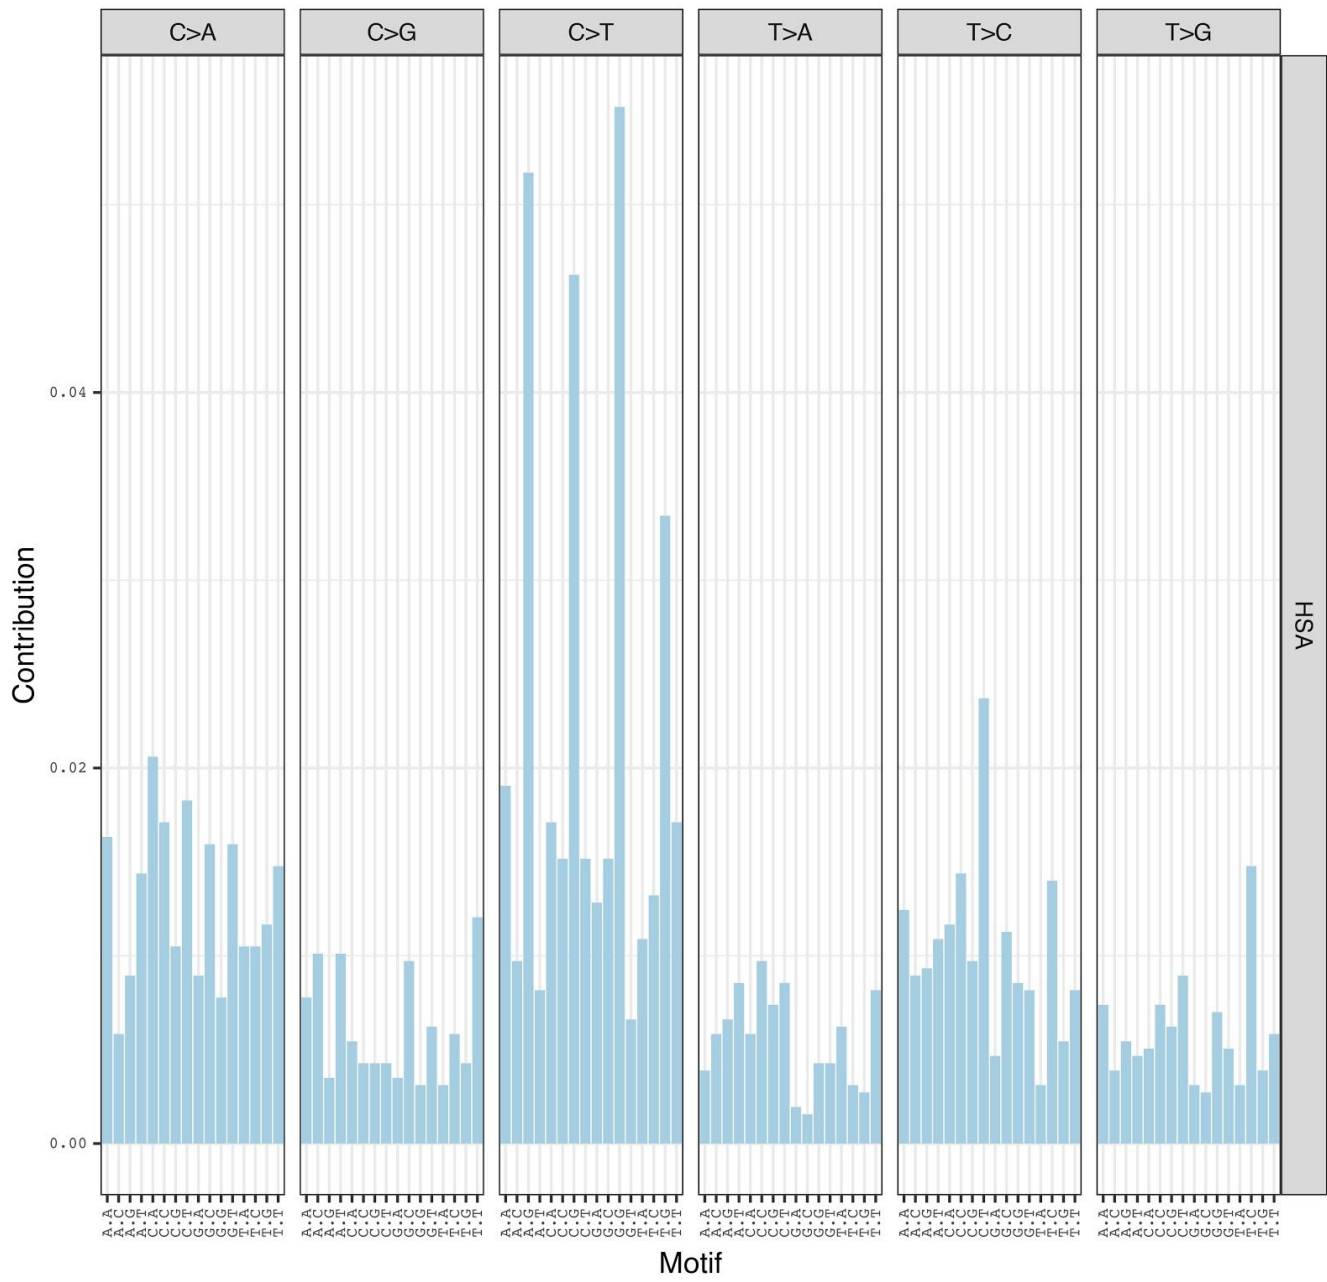

Mutational landscape of all canine hemangiosarcoma cases.

Figure S4 - Mutational landscape: FFPE vs Frozen

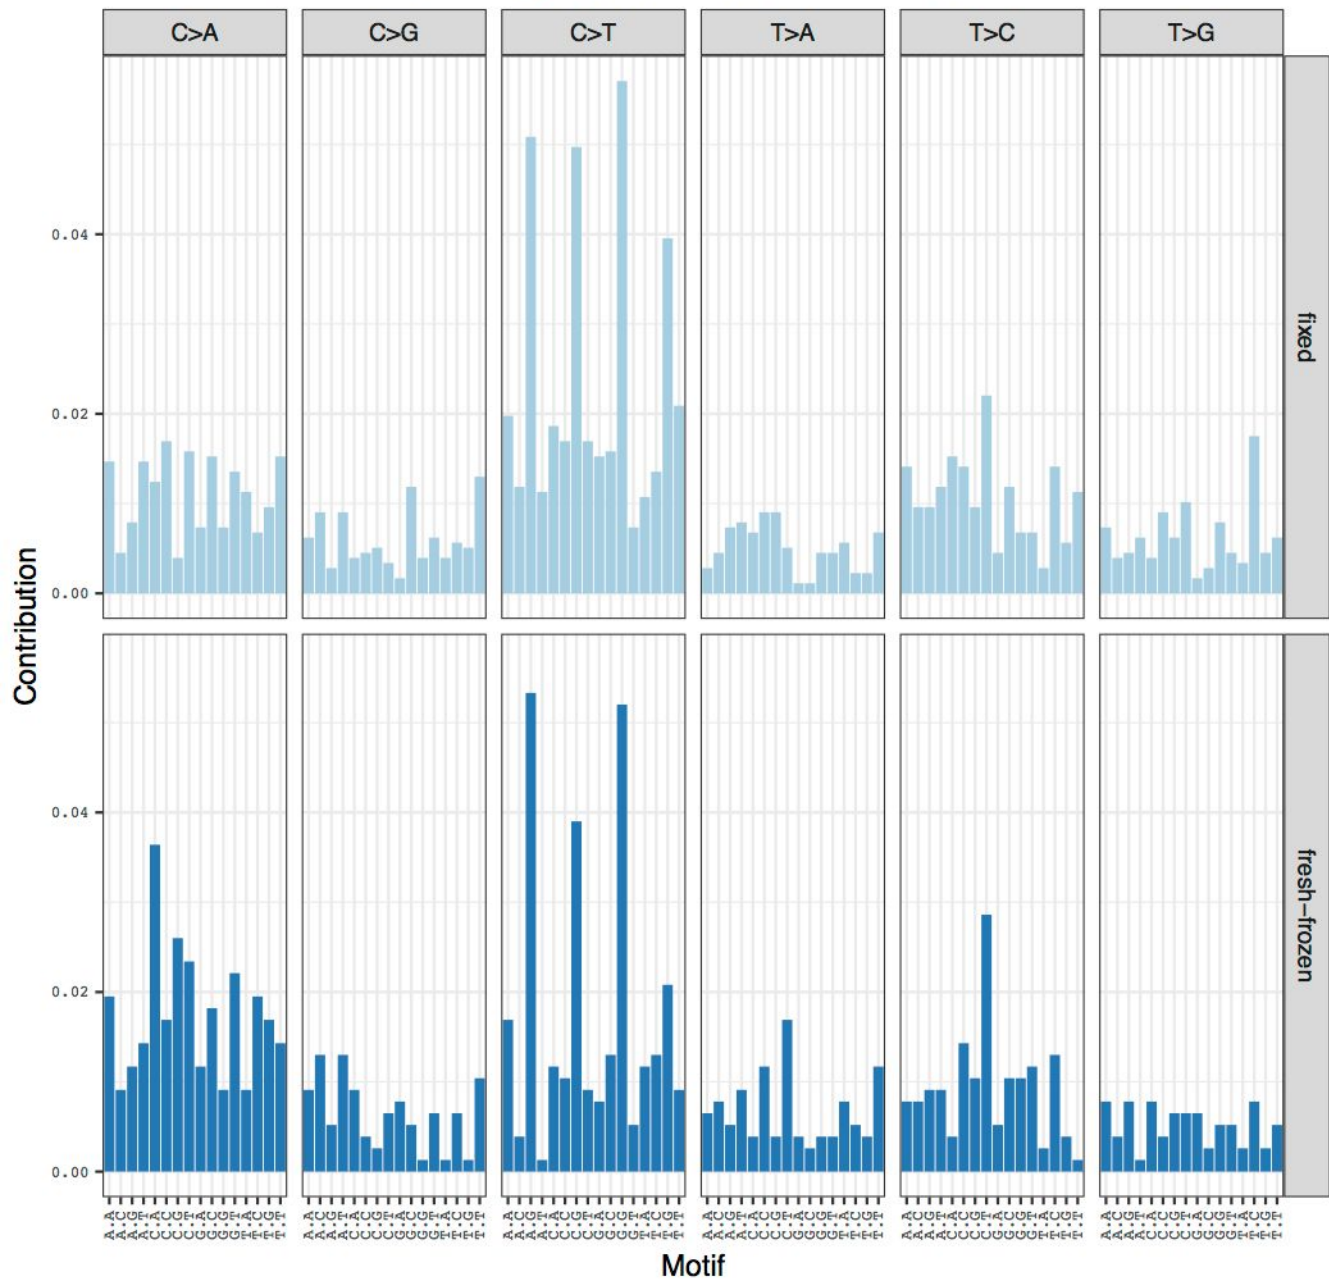

Mutational landscape of all canine cases, divided by tissue handling (fixed vs. frozen).

Figure S5 - Mutational landscape: Canine Tumor Location

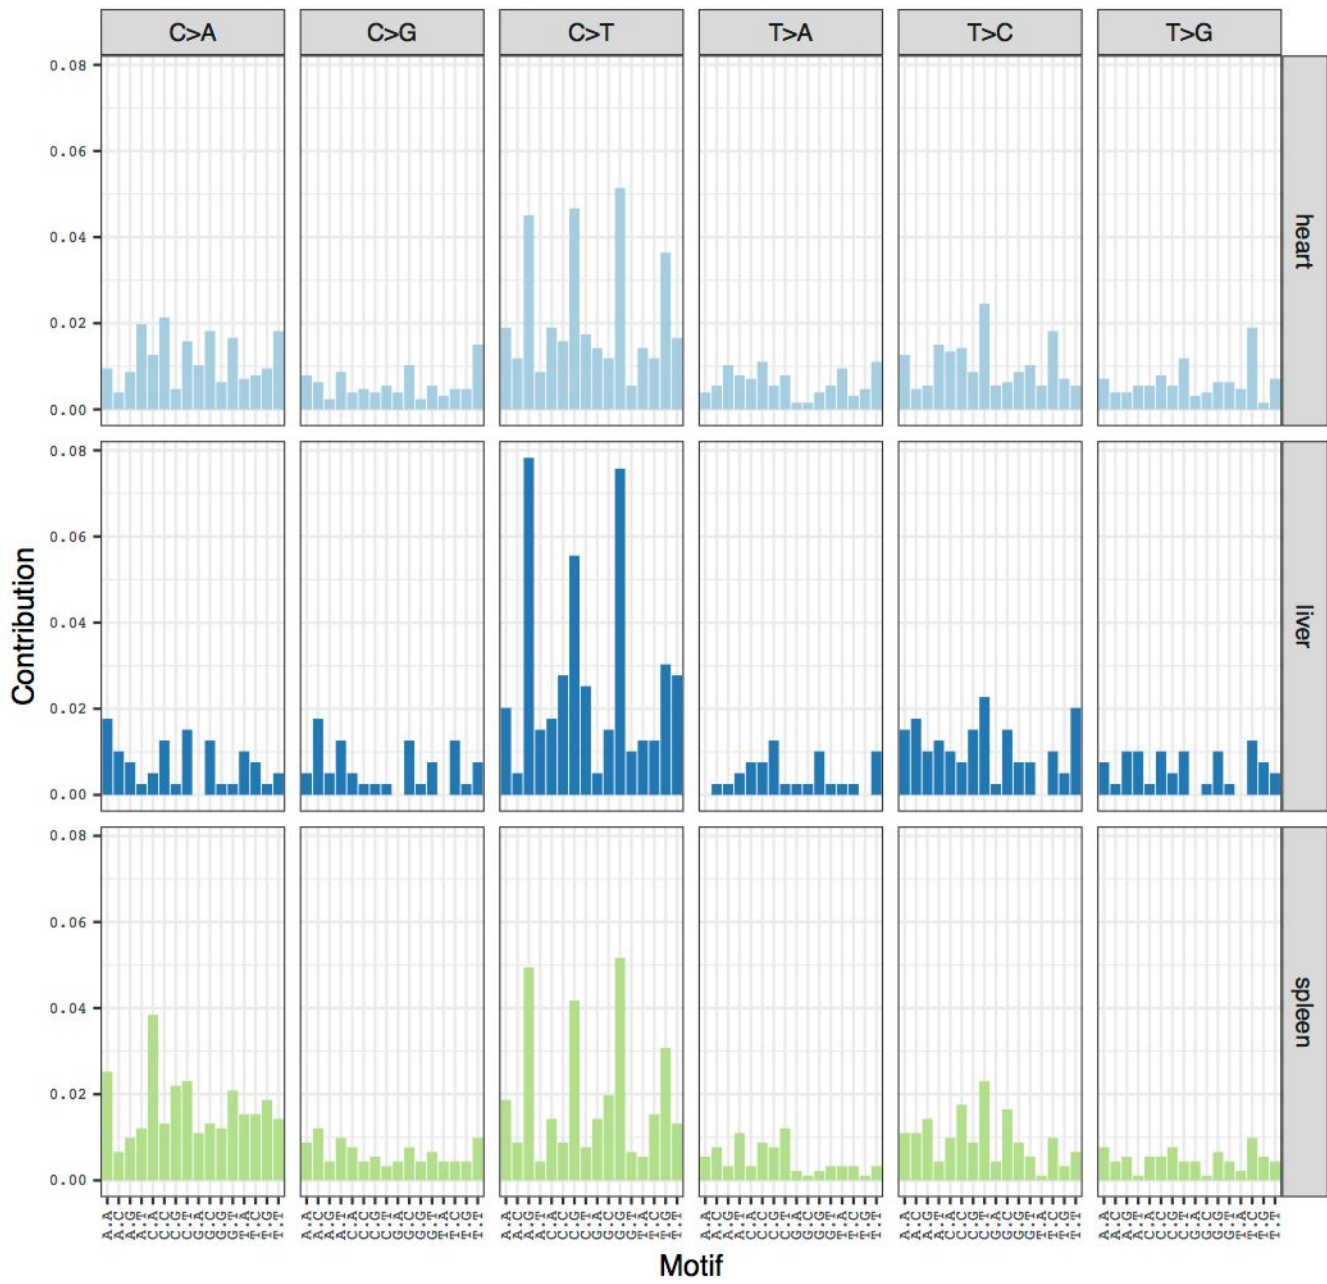

Mutational landscape of all canine cases, divided by tumor location (heart, liver, spleen).



**Figure S6 - FFPE vs Frozen exome SCNA data clustering**

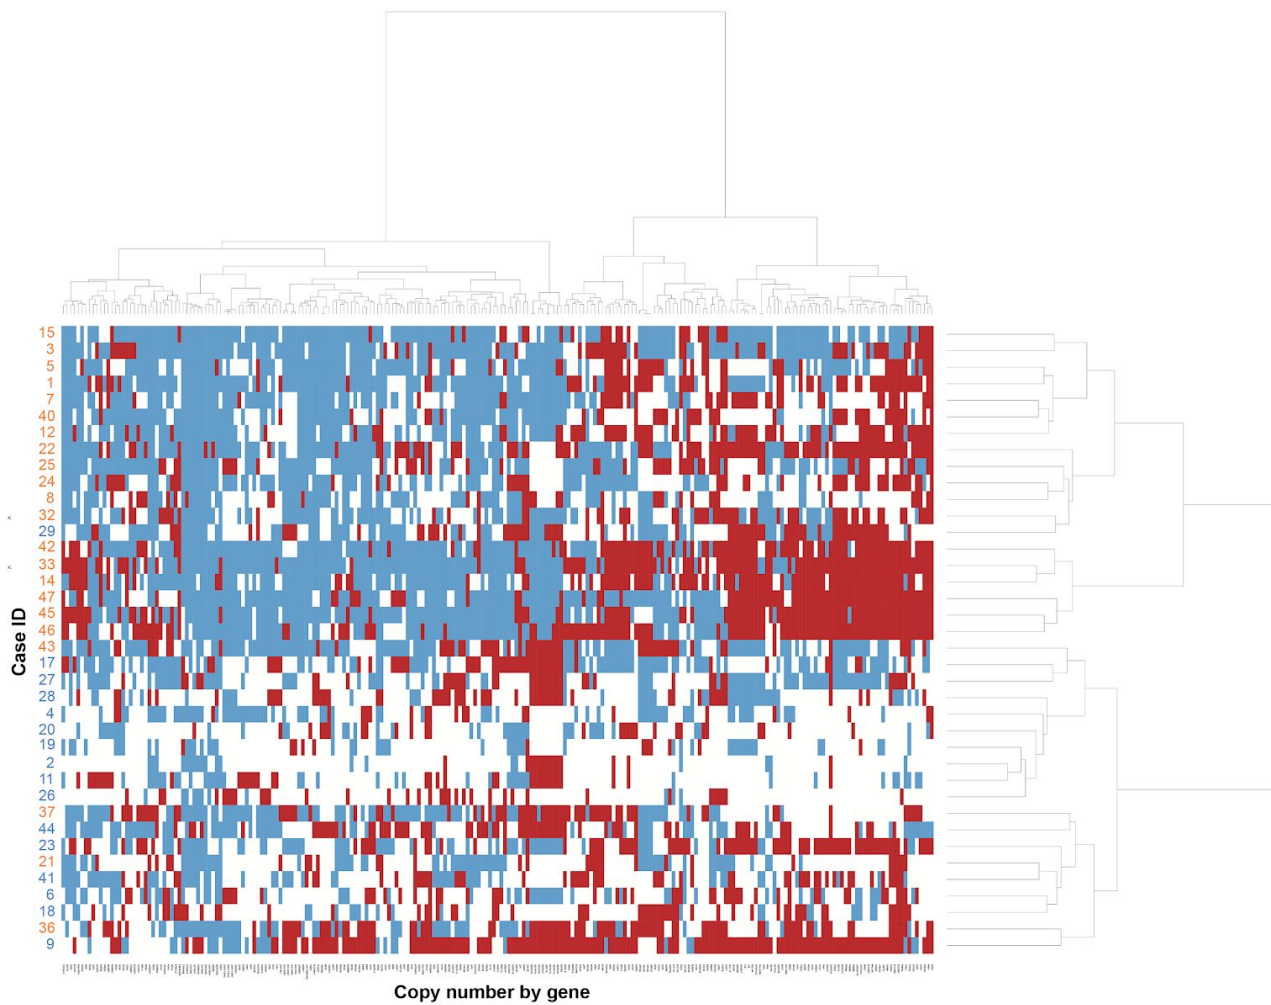

Unsupervised clustering of the VarScan2 copy number aberrations in the 38 canine hemangiosarcoma cases with fewer than 10,000 segments, showing clustering of amplifications (red) and deletions (red) per gene by sample. Case IDs show fixed (orange) or frozen (blue) tissue.

## References

1. Gordon BH, Kim J-H, Sarver AL, Frantz AM, Breen M, Lindblad-Toh K, et al. Identification of three molecular and functional subtypes in canine hemangiosarcoma through gene expression profiling and progenitor cell characterization. *Am J Pathol.* 2014;184:985–95.
2. Borgatti A, Koopmeiners JS, Sarver AL, Winter AL, Stuebner K, Todhunter D, et al. Safe and Effective Sarcoma Therapy through Bispecific Targeting of EGFR and uPAR. *Mol Cancer Ther.* 2017;16:956–65.
3. Thomas R, Borst L, Rotroff D, Motsinger-Reif A, Lindblad-Toh K, Modiano JF, et al. Genomic profiling reveals extensive heterogeneity in somatic DNA copy number aberrations of canine hemangiosarcoma. *Chromosome Res.* 2014;22:305–19.
4. Li H, Durbin R. Fast and accurate short read alignment with Burrows-Wheeler transform. *Bioinformatics.* 2009;25:1754–60.
5. Hoepfner MP, Lundquist A, Pirun M, Meadows JRS, Zamani N, Johnson J, et al. An improved canine genome and a comprehensive catalogue of coding genes and non-coding transcripts. *PLoS One.* 2014;9:e91172.
6. Picard Tools - By Broad Institute [Internet]. [cited 2018 Mar 23]. Available from: <http://broadinstitute.github.io/picard>
7. Van der Auwera GA, Carneiro MO, Hartl C, Poplin R, Del Angel G, Levy-Moonshine A, et al. From FastQ data to high confidence variant calls: the Genome Analysis Toolkit best practices pipeline. *Curr Protoc Bioinformatics.* 2013;43:11.10.1–33.
8. Lindblad-Toh K, Wade CM, Mikkelsen TS, Karlsson EK, Jaffe DB, Kamal M, et al. Genome sequence, comparative analysis and haplotype structure of the domestic dog. *Nature.* 2005;438:803–19.
9. Vaysse A, Ratnakumar A, Derrien T, Axelsson E, Rosengren Pielberg G, Sigurdsson S, et al. Identification of genomic regions associated with phenotypic variation between dog breeds using selection mapping. *PLoS Genet.* 2011;7:e1002316.
10. Axelsson E, Ratnakumar A, Arendt M-L, Maqbool K, Webster MT, Perloski M, et al. The genomic signature of dog domestication reveals adaptation to a starch-rich diet. *Nature.* 2013;495:360–4.
11. Bai B, Zhao W-M, Tang B-X, Wang Y-Q, Wang L, Zhang Z, et al. DoGSD: the dog and wolf genome SNP database. *Nucleic Acids Res.* 2015;43:D777–83.
12. Cibulskis K, Lawrence MS, Carter SL, Sivachenko A, Jaffe D, Sougnez C, et al. Sensitive detection of somatic point mutations in impure and heterogeneous cancer samples. *Nat Biotechnol.* 2013;31:213–9.
13. Elvers I, Turner-Maier J, Swofford R, Koltochian M, Johnson J, Stewart C, et al. Exome sequencing of lymphomas from three dog breeds reveals somatic mutation patterns reflecting genetic background. *Genome Res.* 2015;25:1634–45.
14. Sakthikumar S, Elvers I, Kim J, Arendt ML, Thomas R, Turner-Maier J, et al. SETD2 Is Recurrently Mutated in Whole-Exome Sequenced Canine Osteosarcoma. *Cancer Res.* 2018;78:3421–31.
15. Costello M, Pugh TJ, Fennell TJ, Stewart C, Lichtenstein L, Meldrim JC, et al. Discovery and characterization of artifactual mutations in deep coverage targeted capture sequencing data due to oxidative DNA damage during sample preparation. *Nucleic Acids Res.* 2013;41:e67.
16. Cingolani P, Platts A, Wang LL, Coon M, Nguyen T, Wang L, et al. A program for annotating and predicting the effects of single nucleotide polymorphisms, SnpEff: SNPs in the genome of *Drosophila melanogaster* strain w1118; iso-2; iso-3. *Fly.* 2012;6:80–92.
17. Dees ND, Zhang Q, Kandoth C, Wendl MC, Schierding W, Koboldt DC, et al. MuSiC: identifying mutational significance in cancer genomes. *Genome Res.* 2012;22:1589–98.
18. Kim J, Mouw KW, Polak P, Braunstein LZ, Kamburov A, Kwiatkowski DJ, et al. Somatic ERCC2 mutations are associated with a distinct genomic signature in urothelial tumors. *Nat Genet.* 2016;48:600–6.
19. Gehring JS, Fischer B, Lawrence M, Huber W. SomaticSignatures: inferring mutational signatures from

single-nucleotide variants. *Bioinformatics*. 2015;31:3673–5.

20. Corrie Painter NW. The Angiosarcoma Project [Internet]. [cited 2018 Sep 24]. Available from: <https://ascproject.org/>
21. Cerami E, Gao J, Dogrusoz U, Gross BE, Sumer SO, Aksoy BA, et al. The cBio cancer genomics portal: an open platform for exploring multidimensional cancer genomics data. *Cancer Discov*. 2012;2:401–4.
22. Gao J, Aksoy BA, Dogrusoz U, Dresdner G, Gross B, Sumer SO, et al. Integrative analysis of complex cancer genomics and clinical profiles using the cBioPortal. *Sci Signal*. 2013;6:11.
23. Dennis G Jr, Sherman BT, Hosack DA, Yang J, Gao W, Lane HC, et al. DAVID: Database for Annotation, Visualization, and Integrated Discovery. *Genome Biol*. 2003;4:P3.
24. Koboldt DC, Zhang Q, Larson DE, Shen D, McLellan MD, Lin L, et al. VarScan 2: somatic mutation and copy number alteration discovery in cancer by exome sequencing. *Genome Res*. 2012;22:568–76.
25. Mermel CH, Schumacher SE, Hill B, Meyerson ML, Beroukhi R, Getz G. GISTIC2.0 facilitates sensitive and confident localization of the targets of focal somatic copy-number alteration in human cancers. *Genome Biol*. 2011;12:R41.
